# Supplementary material
Source: MDPI journal article supplement (https://www.mdpi.com/2035-8148/14/1/1)
Supplement: s1 [file s1]

Table S1. Detected variants.

| Variants detected                                                                 |
|-----------------------------------------------------------------------------------|
| MYH7:rs121913651, NM_000257.4(MYH7): c.1447G>A, p.Glu483Lys                       |
| MYH7:rs3729823, c.4472C>G, p.p.Ser1491Cys                                         |
| MYH7:rs2069542                                                                    |
| MYH7:rs???, NOVEL???, NM_000257.4:c.3847G>A, p.Glu1283Lys                         |
| MYH7:rs2231126                                                                    |
| MYBPC3:rs727504318, NM_000256.3(MYBPC3): c.450A>G                                 |
| MYBPC3:rs34580776, NM_000256.3(MYBPC3): p.Arg326Gln                               |
| MYBPC3:rs1052373                                                                  |
| MYBPC3:rs780012957, NM_000256.3(MYBPC3): c.165C>A, p.Tyr55ter                     |
| MYBPC3:rs???, NOVEL??? NM_000256.3(MYBPC3): c.164A>G, p.Tyr55Cys                  |
| MYBPC3:rs1052373                                                                  |
| MYBPC3:synon., rs3218719                                                          |
| MYBPC3:rs1052373                                                                  |
| MYBPC3:rs775069579, NM_000256.3(MYBPC3): c.1082_1088delAGA, p.Lys361del (1of2Lys) |
| MYBPC3:rs1052373                                                                  |
| MYBPC3:rs1052373                                                                  |
| MYBPC3:RS???, NOVEL???, NM_000256.3:c.89dupA, p.Ala31GlyfsTer18                   |
| MYBPC3:rs34580776, NM_000256.3(MYBPC3): p.Arg326Gln                               |
| MYBPC3:rs3729989, NM_000256.3:c.706A>G, p.Ser236Gly                               |
| MYBPC3:rs3729989, NM_000256.3:c.706A>G, p.Ser236Gly                               |
| MYBPC3:rs1052373                                                                  |
| TNNT2:rs121964856, NM_001276345.2(TNNT2): c.305G>A, p.Arg102Gln                   |
| TNNT2:rs3729547                                                                   |
| TNNI3:synon, rs3729711                                                            |
| TNNI3:rs3729841                                                                   |
| TPM1:rs??? NOVEL???, NM_001018005.1: c.631G>A, p.Ala211Thr                        |
| TRPM4:rs???,NOVEL???, NM_017636.3:c.2158G>A, p.Glu720Lys                          |
| TRPM4:rs???, NOVEL???, NM_017636.3:c.913G>A, p.Gly305Arg                          |
| TRPM4:rs???, NOVEL???, HET, NM_017636.3:c.536G>A, p.Gly179Glu                     |
| TRPM4:rs150391806, NM_017636.3:c.3611C>T, p.Pro1204Leu                            |
| DSC2:rs148185335, NM_024422.3:c.1787C>T, p.Ala596Val                              |
| DSC2:rs148185335, NM_024422.3:c.1787C>T, p.Ala596Val                              |
| DSC2:rs61731921, NM_024422.3:c.2393G>A, p.Arg798Gln                               |
| RYR1:NM_000540.2:c.14833C>T, p.Arg4945Ter (STOP)                                  |
| ABCC9:rs???, NOVEL??, NM_020297.2:c.3394_3395dupAC, p.Pro1133LeufsTer70           |
| DSP:rs???, NOVEL???, NM_004415.2:c.528T>A, p.Ser176Arg                            |
| DSP:rs17604693, NM_004415.2:c.913A>T, p.Ile305Phe                                 |
| FBN1:rs112287730, NM_000138.4:c.2956G>A, p.Ala986Thr                              |
| FBN1:rs???, NOVEL???, NM_000138.4:c.1081G>T, p.Asp361Tyr                          |

|                                                                                                        |
|--------------------------------------------------------------------------------------------------------|
| MYL3:rs139794067, NM_000258.3(MYL3): c.170C>G, p.Ala57Gly                                              |
| JPH2:rs761591158, NM_020433.4:c.692G>A, p.Arg231Gln                                                    |
| CTF1:rs???, NOVEL???, NM_001330.3:c.277G>T, p.Ala93Ser                                                 |
| CSRP3:rs45550635, NM_003476.4:c.10T>C, p.Trp4Arg                                                       |
| CACNA1C:rs???, NOVEL???, NM_199460.2:c.3830T>A, p.Leu1277His                                           |
| PTPN11:rs397507528, NM_002834.3:c.824A>C, p.Asn275Thr                                                  |
| ELN:rs17855988, NM_001278939.1:c.1828G>C, p.Gly610Arg                                                  |
| ELN:rs370619098, NM_001278939.1:c.1363G>A, p.Ala455Thr                                                 |
| NOTCH1:rs???, NOVEL???, NM_017617.3:c.1060G>T, p.Val354Leu                                             |
| MYH6:rs150815925, NM_002471.3:c.4193G>A, p.Arg1398Gln                                                  |
| DMD:rs1800279, hemizyg., (NM_004006.2:c.8762A>G, p.His2921Arg                                          |
| LAMA4:rs???, NOVEL???, NM_001105206.2:c.1436A>G, p.Asp479Gly                                           |
| RBMD20:rs753102653, NM_001134363.1:c.3584C>A, p.Ser1195Tyr                                             |
| TTN:rs16866391, TTN-AS1, TTN, intronic, NR_038271.1:n.447-21865T>C                                     |
| TTN:rs201213901, TTN-AS1, TTN, intronic, NR_038271.1:n.683-232G>A                                      |
| TTN:TTN-AS1, TTN: rs181717727, intron variant, NR_038271.1:n.597-12717C>T                              |
| TTN:rs201043950, TTN-AS1, TTN, intronic, NR_038271.1:n.596+4862C>T                                     |
| TTN:rs181189778, NM_001267550.1:c.43690T>A, p.Ser14564Thr                                              |
| TTN:rs72648940                                                                                         |
| TTN:rs???, NOVEL???, INTRONIC, NM_001267550.1:c.11312-3743G>C                                          |
| TTN:rs72650011, HOMOZYG, NM_001267550.1:c.30274C>T, p.His10092Tyr                                      |
| TTN:rs???, NOVEL???, NM_001267550.1:c.17721G>T, p.Lys5907Asn                                           |
| TTN:rs773984912, TTN-AS1, TTN, intronic variant, NR_038271.1:n.446+10189G>A                            |
| SDHA:rs201741295                                                                                       |
| SDHA:rs201139275                                                                                       |
| SDHA:rs76896145                                                                                        |
| SDHA:rs111387770                                                                                       |
| HCN4:rs???, NOVEL???, in frame deletion, het., NM_005477.2 c.3417-3425 (cCTCCCCCAGga/cga), p.2423-2431 |
| HCN4:rs???, NOVEL???, NM_005477.2:c.3317C>T, p.Pro1106Leu                                              |
| MYPN:rs71534278, NM_001256267.1:c.3335C>T, p.Pro1112Leu                                                |
| ANKRD1:rs150797476, NM_014391.2:c.197G>A, p.Arg66Gln                                                   |
| PKP2:rs200586695, NM_004572.3:c.1114G>C, p.Ala372Pro                                                   |
| PKP2:rs150821281, NM_004572.3:c.419C>T, p.Ser140Phe                                                    |
| PKP2:rs146102241, NM_004572.3:c.1759G>A, p.Val587Ile                                                   |
| NEXN:rs397517853                                                                                       |
| NEXN:rs760927219, NM_144573.3:c.1949_1951delGAG, p.Gly650del                                           |
| NEXN:rs794729091, NM_144573.3:c.1419_1421delAAG, p.Arg475del                                           |
| DSG2:rs2230234, NM_001943.3:c.877A>G, p.Ile293Val                                                      |
| DSG2:rs2230234, NM_001943.3:c.877A>G, p.Ile293Val                                                      |
| PDLIM3:rs???, NOVEL???, intron variant NM_014476.5:c.331-537G>T                                        |
| NKX2-5:rs28936670, NM_004387.3:c.73C>T, p.Arg25Cys                                                     |
